# Supplementary figures and images for: HGF-independent regulation of MET and GAB1 by nonreceptor tyrosine kinase FER potentiates metastasis in ovarian cancer
Source: PubMed Central journal article supplement — Genes Dev. 2016 Jul 1;30(13):1542–57. doi: 10.1101/gad.284166.116 (PMC4949327; doi:10.1101/gad.284166.116), 2016-07-01

**A.**

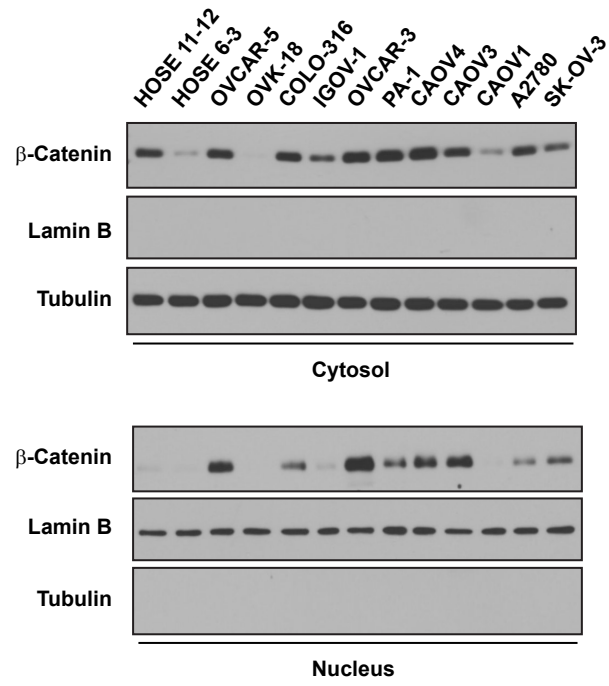

**B.**

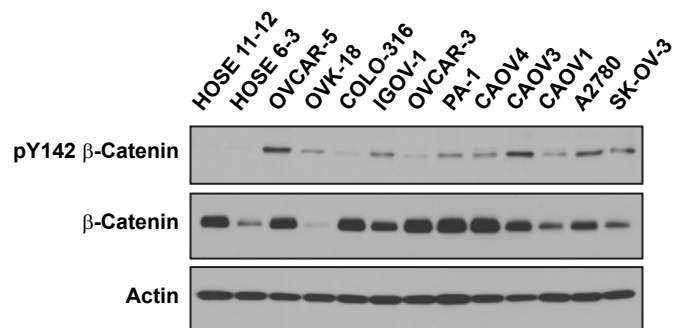

Supplement: supp_30.13.1542_Supplemental_Fig_S1.pdf [file supp_30.13.1542_Supplemental_Fig_S1.pdf]

**A.**

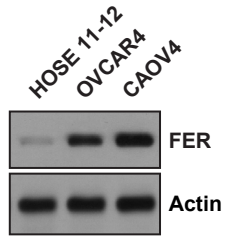

**C.**

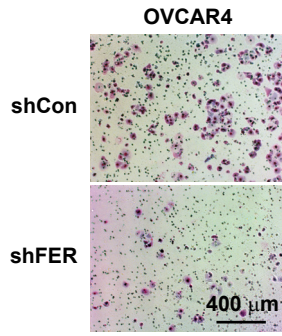

**D.**

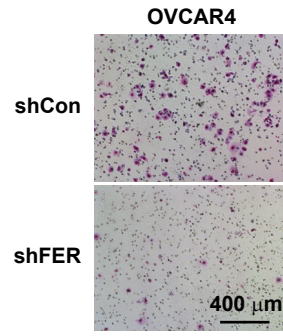

**B.**

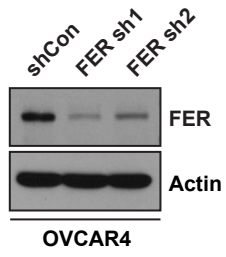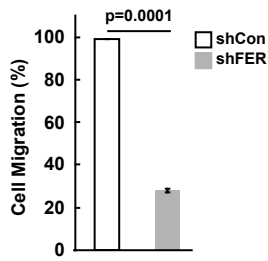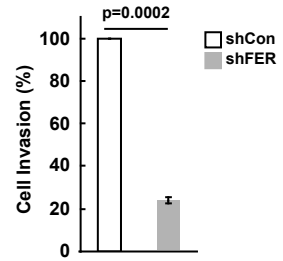

Supplement: supp_30.13.1542_Supplemental_Fig_S2.pdf [file supp_30.13.1542_Supplemental_Fig_S2.pdf]

**A.**

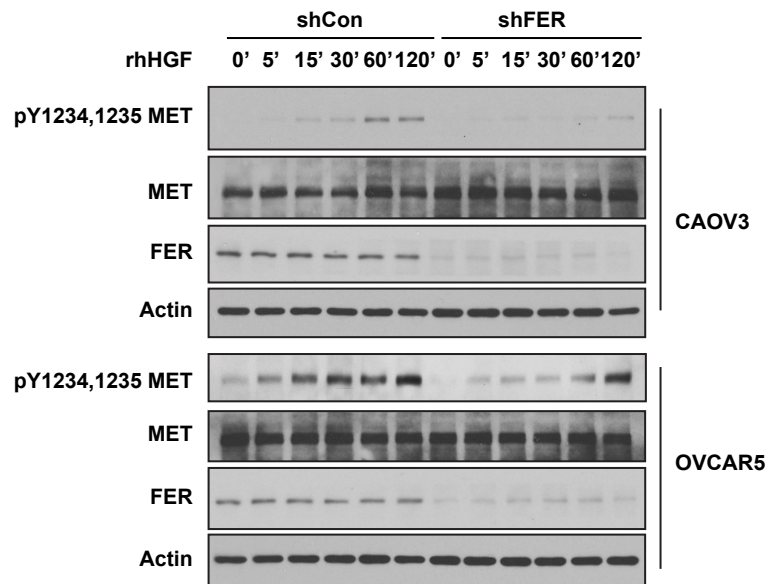

**B.**

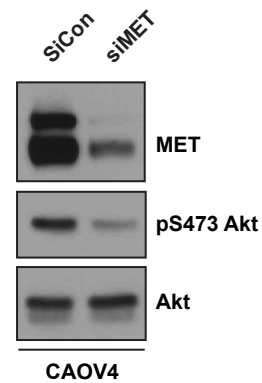

**C.**

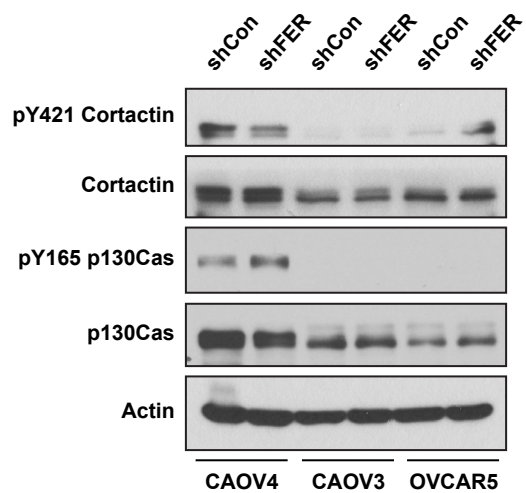

**D.**

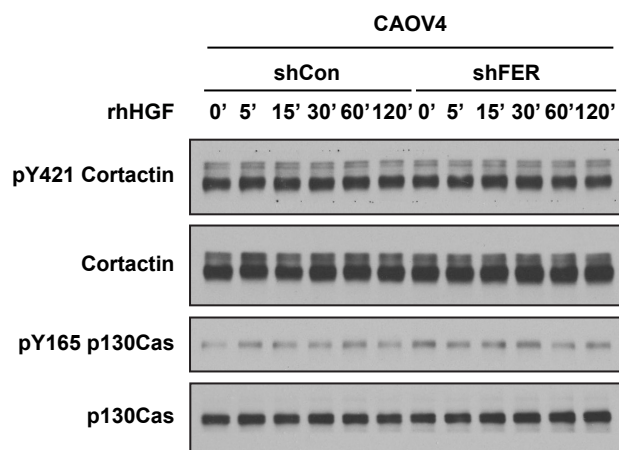

Supplement: supp_30.13.1542_Supplemental_Fig_S3.pdf [file supp_30.13.1542_Supplemental_Fig_S3.pdf]

**A.**

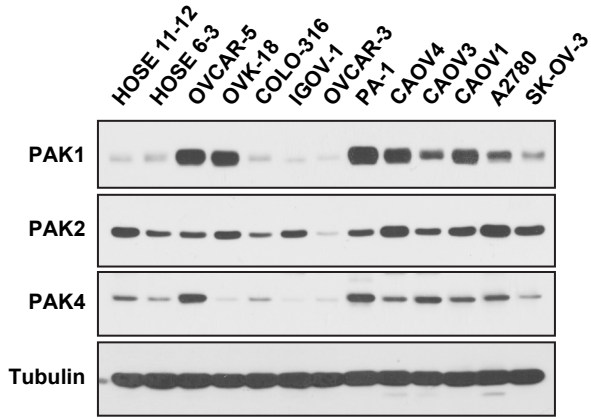

**B.**

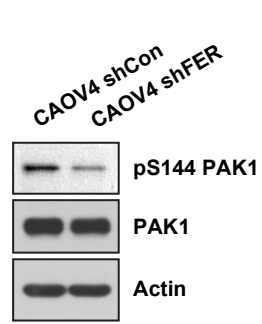

**C.**

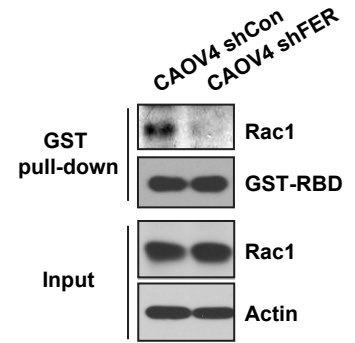

**D.**

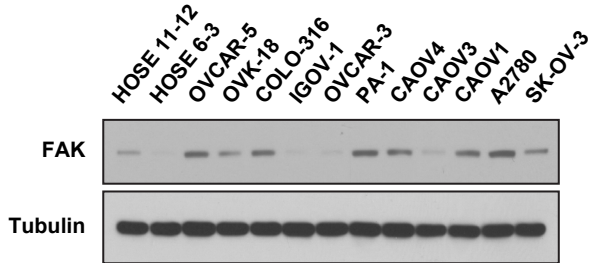

**E.**

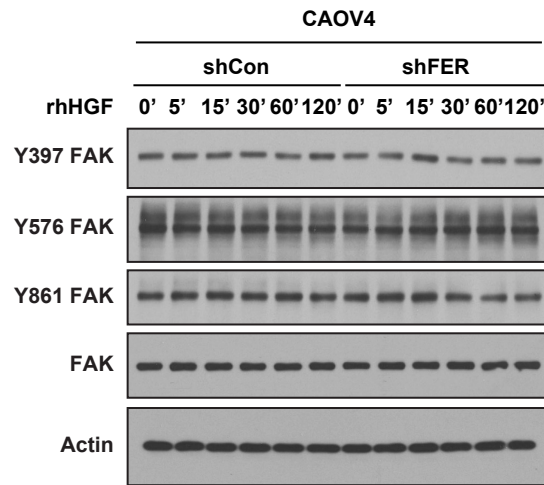

Supplement: supp_30.13.1542_Supplemental_Fig_S4.pdf [file supp_30.13.1542_Supplemental_Fig_S4.pdf]

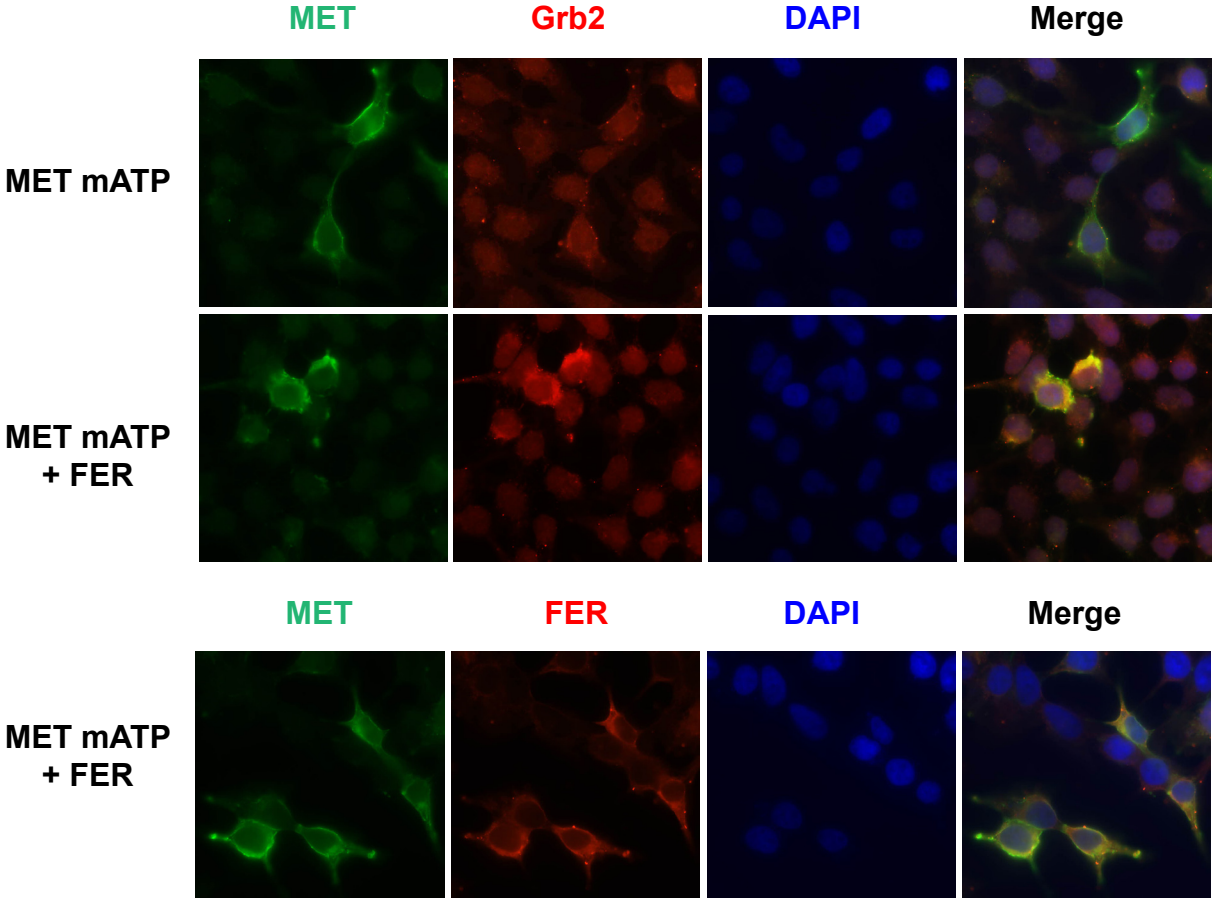

Supplement: supp_30.13.1542_Supplemental_Fig_S5.pdf [file supp_30.13.1542_Supplemental_Fig_S5.pdf]

Peritoneal Wall

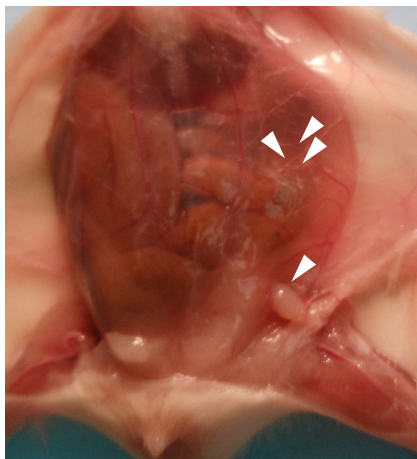

Mesentery

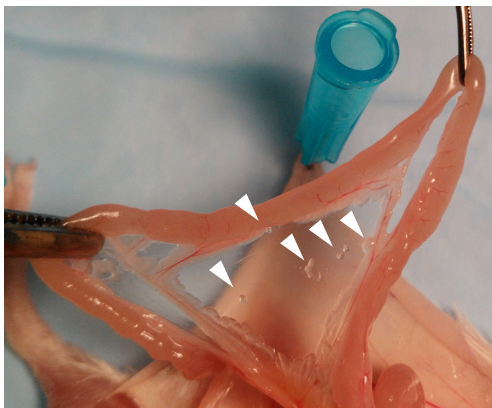

Liver

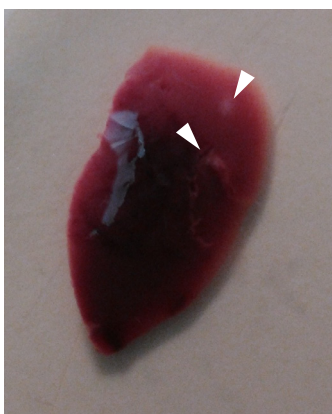

Diaphragm\_1

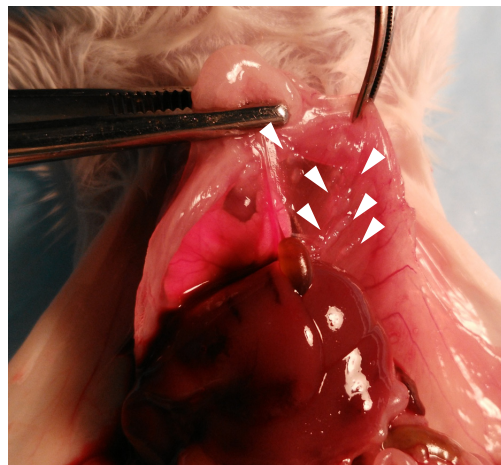

Stomach

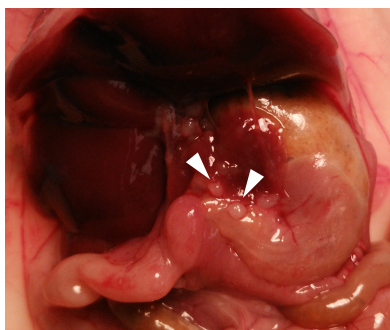

Diaphragm\_2

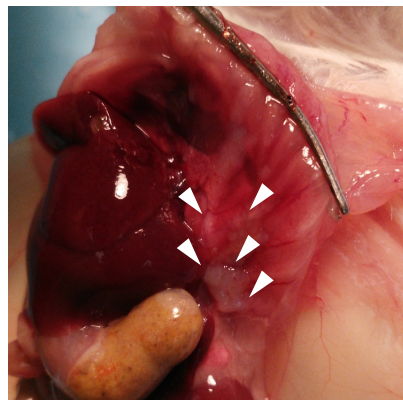

Omentum\_1

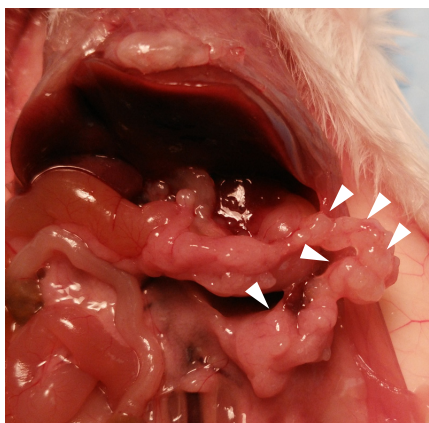

Omentum\_2

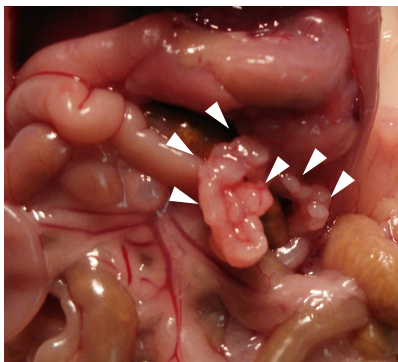

Supplement: supp_30.13.1542_Supplemental_Fig_S6.pdf [file supp_30.13.1542_Supplemental_Fig_S6.pdf]

**A.**

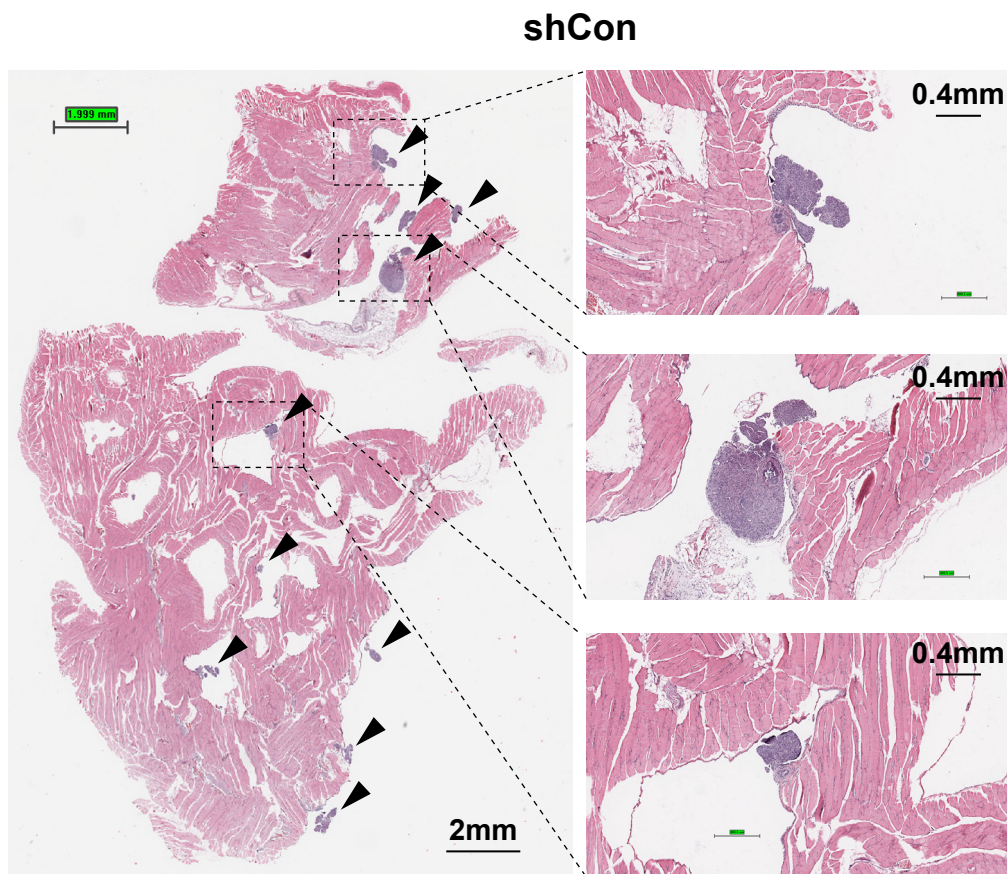

**B.**

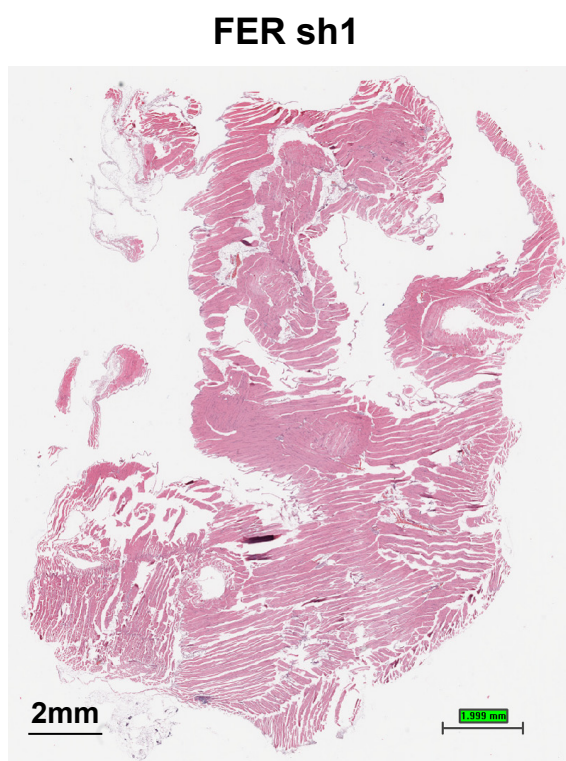

**C.**

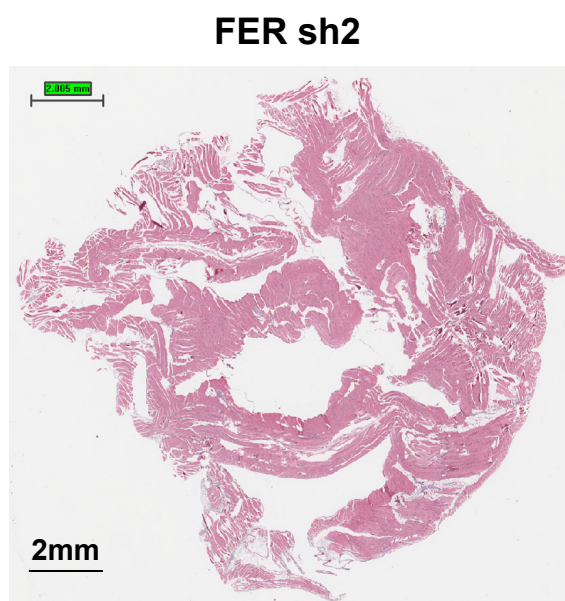

Supplement: supp_30.13.1542_Supplemental_Fig_S7.pdf [file supp_30.13.1542_Supplemental_Fig_S7.pdf]
